# Supplementary material
Source: MDPI journal article supplement (https://www.mdpi.com/2079-9284/9/1/14)
Supplement: s1 [file s1]

*Article*

# **Phytochemical Analysis and Antioxidant, Antimicrobial, and Antiaging Activities of Ethanolic Seed Extracts of Four *Mucuna* Species**

**Tinnakorn Theansungnoen <sup>1,2</sup>, Nichcha Nitthikan <sup>3</sup>, Mayuramas Wilai <sup>1,4</sup>, Phanupong Chaiwut <sup>1,2</sup>, Kanokwan Kiattisin <sup>3,5,\*</sup> and Aekkhaluck Intharuksa <sup>3,\*</sup>**

**Supplementary material**

|            |                                                                                    |
|------------|------------------------------------------------------------------------------------|
|            | ..... ..... ..... ..... ..... ..... ..... .....                                    |
|            | 10                  20                  30                  40                  50 |
| <b>MGG</b> | ATGCGATACT TGGTGTGAAT TGCAGAATCC CGTGAACCAT CGAGTCTTTG                             |
| <b>MMM</b> | ATGCGATACT TGGTGTGAAT TGCAGAATCC CGTGAACCAT CGAGTCTTTG                             |
| <b>MIT</b> | ATGCGATACT TGGTGTGAAT TGCAGAATCC CGTGAACCAT CGAGTCTTTG                             |
| <b>MPR</b> | TTGCGATACT TGGTGTGAAT TGCAGAATCC CGTGAACCAT CGAGTCTTTG                             |

|            |                                                                                     |
|------------|-------------------------------------------------------------------------------------|
|            | ..... ..... ..... ..... ..... ..... ..... .....                                     |
|            | 60                  70                  80                  90                  100 |
| <b>MGG</b> | AACGCAAGTT GCGCCCCAAG CCATTAGGTT GAGGGCACGC CTGCCTGGGT                              |
| <b>MMM</b> | AACGCAAGTT GCGCCCCAAG CCATTAGGTT GAGGGCACGC CTGCCTGGGT                              |
| <b>MIT</b> | AACGCAAGTT GCGCCCCAAG CCATTAGGTT GAGGGCACGC CTGCCTGGGT                              |
| <b>MPR</b> | AACGCAAGTT GCGCCCCAAG CCATTAGGCC GAGGGCACGC CTGCCTGGGT                              |

|            |                                                                                         |
|------------|-----------------------------------------------------------------------------------------|
|            | ..... ..... ..... ..... ..... ..... ..... .....                                         |
|            | 110                  120                  130                  140                  150 |
| <b>MGG</b> | GTCACACATC GTTACCCTAA AGY-AAACGT CTCATGTGCG TTTGCAGGGT                                  |
| <b>MMM</b> | GTCACACATC GTTACCCTAA AGCAAAACGT CTCATGTGCG TGTGCAGGGT                                  |
| <b>MIT</b> | GTCACACATC GTTACCCTAA AGC-AAACGC CTCATGCGCG TGTGCAGGGT                                  |
| <b>MPR</b> | GTCACACATC GTTACCCCAA ATGCAAACGC CTCACGTGCG TGCGCAGGGT                                  |

|            |                                                                                         |
|------------|-----------------------------------------------------------------------------------------|
|            | ..... ..... ..... ..... ..... ..... ..... .....                                         |
|            | 160                  170                  180                  190                  200 |
| <b>MGG</b> | GGAAGTTGAC CTCCCGTGGG CCACAA--CT CGCGGCTGGT TAAAAATGCA                                  |
| <b>MMM</b> | GGAAGCTGAC CTCCCGTGGG GCACGACTCT CGCGGCTGGT TGAAAATGGA                                  |
| <b>MIT</b> | GGAAGCTGAC CTCCCGTGGG CCACGA--CT CGCGGCTGGT TGAAAATGGA                                  |
| <b>MPR</b> | GGATGCTGAC CTCCCGCGAG CATCGT--CT CGTGGCTGGT TGAAAATCGA                                  |

|            |                                                                                         |
|------------|-----------------------------------------------------------------------------------------|
|            | ..... ..... ..... ..... ..... ..... ..... .....                                         |
|            | 210                  220                  230                  240                  250 |
| <b>MGG</b> | GTTCATGGTT GAGAATGCCG TGATAAAATG GTGGATGAGC ATTGCTCGAG                                  |
| <b>MMM</b> | GTTCACGGTT GAGAATGCCG TGATAAAATG GTGGATGAGC GTTGCTCGAG                                  |
| <b>MIT</b> | GTTCATGGTT GAGAATGCCG TGATAAAATG GTGGATGAGC ATTGCTCGAG                                  |
| <b>MPR</b> | GTCCGCGGCC GAGCTCGTCG CGACAAAATG GTGGATGAGC GATGCTCGAG                                  |

|            |                                                                                         |
|------------|-----------------------------------------------------------------------------------------|
|            | ..... ..... ..... ..... ..... ..... ..... .....                                         |
|            | 260                  270                  280                  290                  300 |
| <b>MGG</b> | ACCAATCGCG TGCTACTCAG TTAATTTTGG ACTCCTTGAC CCAKAW-GCA                                  |
| <b>MMM</b> | ACCAATCGCG TGCTACTCAG TTAATTTTGG ACTCTTTGAC CCAGAT-GCG                                  |
| <b>MIT</b> | ACCAATCGCG TGCGACTCGG TCAATTTTGG ACTCTTCGAC CCAAATCGCG                                  |
| <b>MPR</b> | ACCAGTCGCG CCGGACCCGG CCAAGGTCGG ACTCCCCGAC CCTACACGCG                                  |

|            |                                                                                         |
|------------|-----------------------------------------------------------------------------------------|
|            | ..... ..... ..... ..... ..... ..... ..... .....                                         |
|            | 310                  320                  330                  340                  350 |
| <b>MGG</b> | TCCTCGGATG CTCCCAACGA GACCTCAGGT CAGGCGGGGC CACCCGCTGA                                  |
| <b>MMM</b> | TCCTCGGACG CTCCCAACGA GACCTCAGGT CAGGCGGGGC TACCCGCTGA                                  |
| <b>MIT</b> | TCCACGGACG CTCCCAACGA GACCTCAGGT CAGGCGGGGC CACCCGCTGA                                  |
| <b>MPR</b> | TCCACGGACG CTCCCAACGA GACCTCAGGT CAGGCGGGGC TACCCGCTGA                                  |

|            |                                                                                         |
|------------|-----------------------------------------------------------------------------------------|
|            | ..... ..... ..... ..... ..... ..... ..... ..... ..... .....                             |
|            | 360                  370                  380                  390                  400 |
| <b>MGG</b> | GTTTAAGCAT ATCAATAAGC GGAGGAAAAG AAATAACAA GGATTCCCTT                                   |
| <b>MMM</b> | GTTTAAGCAT ATCAATAAGC GGAGGAAAAG AAATAACAA GGATTCCCTT                                   |
| <b>MIT</b> | GTTTAAGCAT ATCAATAAGC GGAGGAAAAG AAATAACAA GGATTCCCTT                                   |
| <b>MPR</b> | GTTTAAGCAT ATCAATAAGC GGAGGAAAAG AAATAACAA GGATTCCCTT                                   |

  

|            |                                                                                         |
|------------|-----------------------------------------------------------------------------------------|
|            | ..... ..... ..... ..... ..... ..... ..... ..... ..... .....                             |
|            | 410                  420                  430                  440                  450 |
| <b>MGG</b> | AGTAACGGCG AGCGAACCGG GAAGAGCCCA CCATGAAAAT CGGTCGTCAT                                  |
| <b>MMM</b> | AGTAACGGCG AGCGAACCGG GAAGAGCCCA CCATGAAAAT CGGTCGTCAT                                  |
| <b>MIT</b> | AGTAACGGCG AGCGAACCGG GAAGAGCCCA CCATGAAAAT CGGTCGTCAT                                  |
| <b>MPR</b> | AGTAACGGCG AGCGAACCGG GAAGAGCCCA CCATGAAAAT CGGTCGCCCT                                  |

  

|            |                                                                                         |
|------------|-----------------------------------------------------------------------------------------|
|            | ..... ..... ..... ..... ..... ..... ..... ..... ..... .....                             |
|            | 460                  470                  480                  490                  500 |
| <b>MGG</b> | CGGCGTCCGA ATTGTAGTCT G                                                                 |
| <b>MMM</b> | CGGCGTCCGA ATTGTAGTCT G                                                                 |
| <b>MIT</b> | CGGCGTCCGA ATAGTAGTCT G                                                                 |
| <b>MPR</b> | CGGCGTCCGA ATTGTAGTCT G                                                                 |

**Figure S1:** Alignment of nucleotide sequences of the ribosomal DNA ITS2 regions of four *Mucuna* species: *M. gigantea* (MGG), *M. interrupta* (MIT), *M. monosperma* (MMM), and *M. pruriens* (MPR) (continued)

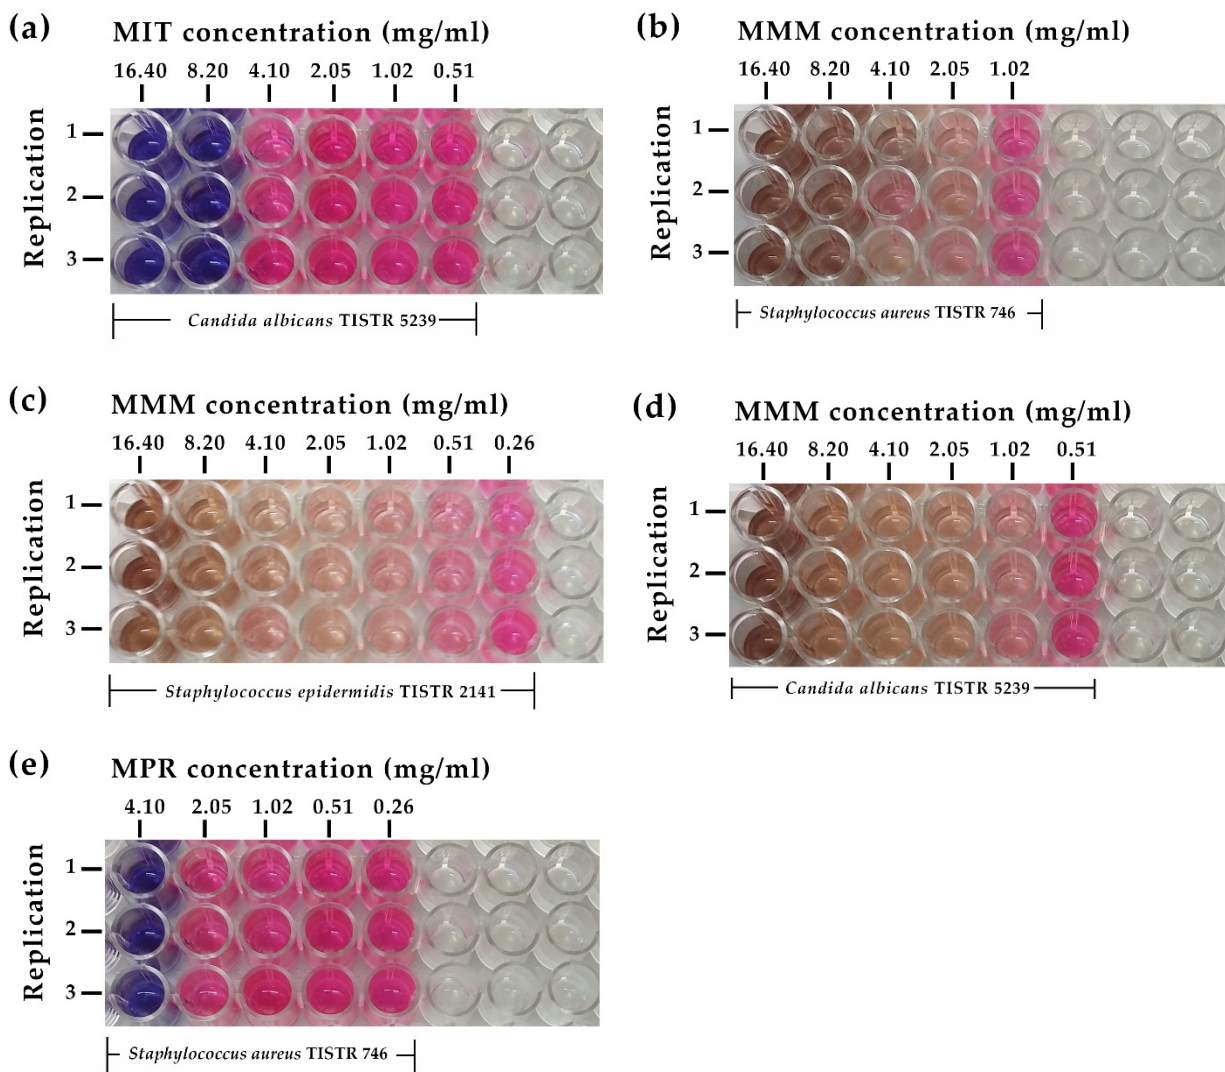

**Figure S2:** Minimal inhibitory concentrations (MICs) of *Mucuna* seed extracts on skin-related pathogen evaluated by broth micro-dilution and resazurin reduction methods. (a) Resazurin reduction of *Candida albicans* TISTR 5239 incubated with *M. interrupta* (MIT), (b) Resazurin reduction of *Staphylococcus aureus* TISTR 746 incubated with *M. monosperma* (MMM), (c) Resazurin reduction of *Staphylococcus epidermidis* TISTR 2141 incubated with *M. monosperma* (MMM), (d) Resazurin reduction of *Candida albicans* TISTR 5239 incubated with *M. monosperma* (MMM), and (e) Resazurin reduction of *Staphylococcus aureus* TISTR 746 incubated with *M. pruriens* (MPR). MICs were measured at the lowest concentrations of tests that did not change to pink color.

**Table S1:** Phytochemical constituents of *Mucuna* seed extracts evaluated by GC-MS analysis.

| No. | MGG   |                                  |       | MIT   |                                                         |       | MMM   |                                                |       | MPR   |                                           |       |
|-----|-------|----------------------------------|-------|-------|---------------------------------------------------------|-------|-------|------------------------------------------------|-------|-------|-------------------------------------------|-------|
|     | RT    | Compounds                        | %Area | RT    | Compounds                                               | %Area | RT    | Compounds                                      | %Area | RT    | Compounds                                 | %Area |
| 1   | 6.79  | Azetidine                        | 8.3   | 6.01  | Undecane                                                | 18.5  | 6.01  | Undecane                                       | 3.2   | 6.07  | 1,2,3-Propanetriol, monoacetate           | 13.6  |
| 2   | 12.36 | 2,4-Di-tert-butylphenol, acetate | 66.7  | 19.78 | 2-amino-6-cholo-3-cyano-5-(3-methyl-1-butenyl) pyrazine | 21.5  | 6.29  | Maltol                                         | 9.7   | 8.07  | Butyl 2-methylbutanoate                   | 11.6  |
| 3   | 16.86 | 2-Propenenitrile, 2-chloro-      | 8.3   | 21.65 | Bis(2-ethylhexyl) phthalate                             | 43.1  | 11.07 | Cytidine                                       | 2.5   | 16.49 | Palmitic acid                             | 27.9  |
| 4   | 18.77 | Urea, methyl-                    | 16.7  | 23.39 | Hexamethylcyclotrisiloxane                              | 16.9  | 14.47 | Resorcinol                                     | 9.0   | 18.15 | Linoleic acid                             | 29.3  |
| 5   | -     | -                                | -     | -     | -                                                       | -     | 16.48 | Palmitic acid                                  | 13.2  | 18.38 | Stearic acid                              | 8.8   |
| 6   | -     | -                                | -     | -     | -                                                       | -     | 18.19 | Dodecanamide, N-(2-hydroxyethyl)               | 29.8  | 19.74 | 4-Hydroxy-2,2,6-trimethylcyclohex-2-enone | 4.8   |
| 7   | -     | -                                | -     | -     | -                                                       | -     | 19.78 | 5-(N-piperidyl)-4-oxopentanoic acid piperidide | 9.1   | 21.14 | 2-Ethylacridine                           | 2.0   |
| 8   | -     | -                                | -     | -     | -                                                       | -     | 21.66 | Bis(2-ethylhexyl) phthalate                    | 23.5  | 21.66 | Bis(2-ethylhexyl) phthalate               | 2.0   |
